# Supplementary material
Source: publisher site journal article supplement (http://degruyter.com/publication/journal_key/CHEM/downloadAsset/CHEM_CFP_4th%20Edition%20of%20the%20International%20Conference%20on%20Green%20Chemistry%20and%20Renewable%20Energy.pdf)
Supplement: Supplementary file 1 [file CHEM_CFP_4th%20Edition%20of%20the%20International%20Conference%20on%20Green%20Chemistry%20and%20Renewable%20Energy.pdf]

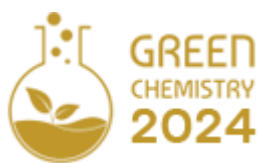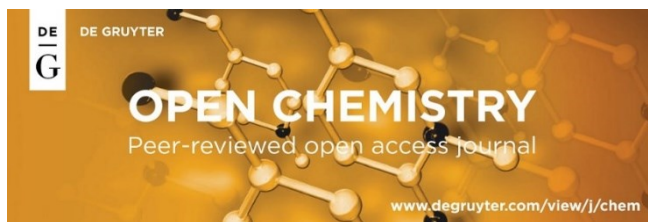

## DE GRUYTER

4th Edition of the International Conference on Green Chemistry and Renewable Energy

(GREEN CHEMISTRY 2024)

17-19 June, 2024

Paris, France

### DESCRIPTION

With the theme of “*Sustainable Chemistry: Green Approaches for a Greener Future*” pressing need for sustainable growth, the chemical industry and its underlying chemistry must undergo transformation. **GREEN CHEMISTRY 2024** will showcase the latest breakthroughs in the field, focusing on practical applications and global results. The conference brings together professionals and experts from various disciplines, including academicians, scientists, researchers, engineers, environmentalists, and industrialists, to discuss the most important challenges in Green Chemistry and Renewable Energy. It emphasizes the role of Green Chemistry in realizing the United Nations' Sustainable Development Goals.

Attendees can look forward to keynote speeches, oral presentations, poster sessions, technical sessions, and interactive discussions. With its comprehensive scientific program, GREEN CHEMISTRY 2024 provides a platform for knowledge sharing and collaboration. Join us in shaping a sustainable future by participating in this transformative conference. Register now and experience a productive and engaging event.

### HOW TO SUBMIT

The authors are kindly invited to register at our paper processing system and submit their contribution (both original papers or reviews are welcome). **We offer a discount to for attendees of the conference. All attendees of both conferences will receive 20 % discount for our Open Chemistry.** Please write about attending the conference in the cover letter. All manuscripts will undergo the standard peer-review process (single-blind, at least two independent reviewers) and will be treated in the same way as other regular articles (indexing, abstracting, immediate publication, etc.).

In case of any questions please contact Open Chemistry Managing Editor:  
Małgorzata Komadowska ([openchemistry@degruyter.com](mailto:openchemistry@degruyter.com)).

<https://www.degruyter.com/chem>  
<https://magnusconferences.com/green-chemistry/>
